# Supplementary material for: Identification of candidate cancer predisposing variants by performing whole-exome sequencing on index patients from BRCA1 and BRCA2-negative breast cancer families
Source: BMC Cancer. 2019 Apr 4;19:313. doi: 10.1186/s12885-019-5494-7 (PMC6449945; doi:10.1186/s12885-019-5494-7)
Supplement: Supplementary file 5 — Types and number of variants detected (exome- and CAGP-wide) before and after variant filtration in each BC patient and control. (XLSX 32 kb) [file 12885_2019_5494_MOESM5_ESM.xlsx]

## Sheet: Additional file 5 (BC patients)
Additional file 5: Types and number of variants detected (exome- and CAGP-wide) before and after variant filtration in each BC patient
Sample number	Number of variants EXOME - wide (before filter)	Types and number of variants EXOME - wide (after filter)										Types and number of variants CAGP - wide (after filter)
		Total	Synonymous_SNVs	Inframe_INDELs	Nonsynonymous_SNVs (Probably damaging)	Nonsynonymous_SNVs (Possibly damaging )	Nonsynonymous_SNVs (benign)	Splice_site_SNVs	Frame_shift_INDELs	Nonsense_SNVs		Total	Synonymous_SNVs	Inframe_INDELs	Nonsynonymous_SNVs (Probably damaging)	Nonsynonymous_SNVs (Possibly damaging )	Nonsynonymous_SNVs (benign)	Splice_site_SNVs	Frame_shift_INDELs	Nonsense_SNVs
BB1	59899	420	152	7	90	40	109	1	13	8		17	2	2	4	4	4	0	0	1
BB2	60927	421	146	7	105	38	107	2	10	6		12	5	0	2	2	3	0	0	0
BB3	59509	385	132	8	96	43	80	9	11	6		13	3	0	4	0	4	1	0	1
BB4	62077	411	131	12	98	55	97	2	8	8		18	6	0	2	5	5	0	0	0
BB5	62167	417	149	9	103	42	98	3	8	5		14	5	0	3	1	4	0	1	0
BB6	60311	392	131	8	89	46	93	5	18	2		18	3	1	7	2	5	0	0	0
BB7	60629	420	144	6	80	39	124	2	15	10		11	4	0	3	1	2	0	0	1
BB8	60375	398	137	7	90	48	99	0	7	10		16	7	0	3	3	3	0	0	0
BB9	61385	398	148	7	92	40	91	6	9	5		12	0	0	5	1	6	0	0	0
BB10	62339	383	140	4	96	41	86	1	10	5		11	0	0	5	2	3	0	1	0
BB11	60404	399	138	2	98	35	109	1	9	7		17	6	1	3	2	5	0	0	0
BB12	61591	406	144	15	100	35	91	3	11	7		10	3	0	4	0	2	0	0	1
BB13	63429	447	155	12	99	39	116	2	14	10		18	5	0	3	3	6	0	0	1
BB14	60627	445	163	10	103	36	108	5	12	8		16	5	0	3	3	4	1	0	0
BB15	61381	397	149	8	86	35	98	1	11	9		11	4	0	1	2	2	0	2	0
BB16	60814	422	154	11	90	42	105	5	10	5		17	5	0	5	1	6	0	0	0
BB17	60784	429	169	8	88	60	89	3	6	6		13	2	1	1	3	5	0	1	0
BB18	60537	438	160	8	108	35	107	3	16	1		16	9	0	2	1	4	0	0	0
BB19	61448	364	131	6	100	30	90	1	5	1		12	2	0	4	2	4	0	0	0
BB20	62020	455	174	17	77	51	116	3	10	7		17	10	0	3	0	4	0	0	0
BB21	61582	424	151	13	86	48	102	4	13	7		13	3	0	4	1	4	1	0	0
BB22	63439	634	225	12	131	69	178	5	8	6		16	5	0	5	1	5	0	0	0
BB23	58747	382	143	10	80	39	100	2	5	3		14	5	0	3	0	6	0	0	0
BB24	59691	385	151	5	78	38	93	2	12	6		12	5	0	3	1	2	0	0	1
BB25	62375	468	167	6	104	54	109	6	13	9		15	2	0	4	3	6	0	0	0
BB26	62672	470	164	5	103	54	129	5	4	6		17	5	0	3	2	7	0	0	0
BB27	61945	406	153	5	94	43	95	1	9	6		12	2	0	4	2	4	0	0	0
BB28	61356	439	159	3	107	45	94	8	18	5		17	8	0	3	2	4	0	0	0
BB29	62756	424	169	9	101	32	97	3	8	5		17	6	0	6	1	2	0	1	1
BB30	61382	396	141	4	85	41	112	0	6	7		18	2	0	6	4	6	0	0	0
BB31	62023	382	129	9	83	42	101	2	11	5		12	3	0	3	2	3	0	0	1
BB32	61582	439	152	11	92	45	118	5	10	6		19	7	1	0	4	6	0	1	0
BB33	61395	389	136	6	111	31	93	2	5	5		15	6	0	3	0	3	0	0	3
BB34	61073	444	140	7	116	42	115	2	14	8		11	2	0	2	1	5	0	1	0
BB35	60967	419	151	6	95	39	109	4	8	7		14	3	0	7	0	2	1	1	0
BB36	61904	464	174	8	121	34	112	0	10	5		17	6	1	3	2	4	0	1	0
BB37	61885	417	135	6	109	44	111	2	6	4		9	3	0	3	1	2	0	0	0
BB38	61818	480	184	11	101	43	120	2	12	7		15	4	0	3	0	7	0	0	1
BB39	61789	414	157	8	87	41	106	4	7	4		13	3	0	4	2	4	0	0	0
BB40	62614	387	147	6	96	30	90	4	10	4		15	4	0	2	2	7	0	0	0
BB41	61264	409	147	5	84	48	103	5	9	8		18	6	0	5	4	2	0	0	1
BB42	61489	417	134	11	91	47	119	1	10	4		10	4	0	2	1	3	0	0	0
BB43	61725	393	146	9	90	32	100	0	12	4		13	2	0	6	0	5	0	0	0
BB44	61595	444	180	6	87	36	113	4	14	4		17	8	0	2	2	4	1	0	0
BB45	61986	390	147	6	78	39	105	4	7	4		14	6	0	3	1	3	1	0	0
BB46	61496	397	123	6	101	41	113	2	8	3		16	4	0	5	1	6	0	0	0
BB47	61124	436	153	11	89	38	124	5	10	6		12	6	1	2	2	1	0	0	0
BB48	61707	418	158	6	95	43	99	2	13	2		18	4	0	5	3	5	0	1	0
BB49	60708	448	147	11	132	27	107	4	12	8		11	1	0	7	0	3	0	0	0
BB50	60889	401	157	9	91	33	94	3	10	4		9	6	0	2	0	1	0	0	0
BB51	61388	403	126	7	106	35	121	0	4	4		14	3	0	5	2	4	0	0	0
BB52	61882	441	175	10	88	37	105	7	15	4		16	5	0	4	5	1	0	1	0
BB53	60854	403	139	4	91	48	107	1	11	2		17	7	0	3	4	3	0	0	0
BB54	62875	414	146	9	91	39	115	3	6	5		20	8	0	6	0	4	0	1	1

## Sheet: Additional file 5 (Controls)
Additional file 5: Types and number of variants detected (exome- and CAGP-wide) before and after variant filtration in each control sample
Sample number	Number of variants EXOME - wide (before filter)	Types and number of variants EXOME - wide (after filter)										Types and number of variants CAGP - wide (after filter)
		Total	Synonymous_SNVs	Inframe_INDELs	Nonsynonymous_SNVs (Probably damaging)	Nonsynonymous_SNVs (Possibly damaging )	Nonsynonymous_SNVs (benign)	Splice_site_SNVs	Frame_shift_INDELs	Nonsense_SNVs		Total	Synonymous_SNVs	Inframe_INDELs	Nonsynonymous_SNVs (Probably damaging)	Nonsynonymous_SNVs (Possibly damaging )	Nonsynonymous_SNVs (benign)	Splice_site_SNVs	Frame_shift_INDELs	Nonsense_SNVs
1	61120	418	134	11	94	49	112	4	6	8		13	5	0	0	1	6	1	0	0
2	61182	402	155	6	96	34	96	3	7	5		7	4	0	2	0	1	0	0	0
3	60008	410	135	7	114	42	98	2	10	2		15	2	0	6	2	4	0	0	1
4	60427	423	149	10	94	34	116	3	9	8		17	5	0	7	1	4	0	0	0
5	61300	405	145	10	91	43	99	6	9	2		11	7	0	0	1	3	0	0	0
6	62132	381	138	7	97	33	95	1	7	3		13	6	1	4	1	0	1	0	0
7	61882	412	166	4	86	43	102	3	2	6		15	7	0	3	1	4	0	0	0
8	61631	420	142	13	91	40	112	4	14	4		16	8	0	4	1	3	0	0	0
9	61684	424	136	11	96	46	111	8	12	4		17	6	0	2	2	5	2	0	0
10	61135	429	143	11	94	44	116	4	10	7		11	2	0	2	2	4	1	0	0
11	61090	400	136	8	99	49	91	4	6	7		23	9	0	7	1	6	0	0	0
12	61691	423	166	7	88	40	105	4	9	4		14	6	1	4	1	2	0	0	0
13	61700	460	156	12	114	50	108	4	10	6		18	7	0	6	0	3	1	1	0
14	61237	427	183	4	94	45	90	1	6	4		14	6	0	1	4	3	0	0	0
15	62117	416	154	5	77	51	112	5	5	7		13	5	0	2	1	5	0	0	0
16	61455	412	143	7	107	37	99	4	9	6		12	6	0	2	1	2	0	1	0
17	62942	512	173	14	110	69	128	2	10	6		20	11	0	1	3	4	0	1	0
18	60788	361	131	6	85	36	89	2	7	5		12	2	0	2	1	6	1	0	0
19	62590	423	136	12	110	47	101	4	7	6		20	6	1	4	3	6	0	0	0
20	61795	429	144	8	102	36	119	3	9	8		21	6	0	2	2	11	0	0	0
21	61739	452	146	11	113	49	104	6	18	5		12	3	1	2	1	4	0	1	0
22	60634	394	111	6	108	37	113	3	11	5		14	3	0	4	1	6	0	0	0
23	61349	450	150	6	116	51	109	3	9	6		11	5	0	3	1	0	0	2	0
24	61556	426	152	5	103	37	111	7	6	5		10	2	0	3	3	2	0	0	0
25	61575	404	159	6	82	39	101	4	6	7		18	10	0	4	1	3	0	0	0
26	61208	425	142	5	107	43	107	3	4	14		14	4	0	3	2	3	1	0	1
27	61851	387	134	8	89	40	103	3	6	4		10	3	0	2	2	3	0	0	0
28	61989	432	158	5	105	40	109	1	7	7		12	4	1	2	2	3	0	0	0
29	61824	452	152	10	107	51	118	7	3	4		9	5	0	0	0	4	0	0	0
30	61308	425	155	7	87	46	112	3	11	4		14	4	0	4	4	2	0	0	0
31	62294	447	168	9	97	45	110	7	6	5		19	5	0	6	3	5	0	0	0
32	62736	395	137	4	84	37	109	1	18	5		13	4	0	2	2	3	0	1	1
33	61719	414	147	5	95	44	101	5	13	4		13	7	0	5	0	1	0	0	0
34	61694	417	146	6	105	37	100	3	9	11		19	8	1	5	2	2	0	0	1
35	62351	394	125	8	87	39	119	3	4	9		14	3	0	0	4	7	0	0	0
36	61966	441	160	9	98	42	118	2	7	5		7	3	0	2	1	1	0	0	0
37	61344	410	142	5	91	41	111	2	10	8		17	4	0	5	2	6	0	0	0
38	62288	367	139	11	82	37	84	5	5	4		11	3	0	3	2	3	0	0	0
39	60413	385	143	7	95	34	97	0	7	2		9	1	0	5	0	3	0	0	0
40	60685	450	149	10	94	68	107	4	10	8		18	4	0	3	3	8	0	0	0
41	60972	470	171	5	102	47	120	3	17	5		22	6	0	6	1	6	0	2	1
42	59943	410	132	9	95	37	116	4	10	7		13	4	0	3	1	5	0	0	0
43	60731	388	130	9	93	32	103	4	9	8		13	6	0	4	2	1	0	0	0
44	61345	413	146	7	92	43	100	5	11	9		12	3	0	4	1	2	1	1	0
45	61449	456	156	9	101	38	133	6	8	5		15	5	0	9	0	1	0	0	0
46	61757	403	130	11	100	43	105	3	10	1		20	6	0	8	4	2	0	0	0
47	60954	413	150	7	90	39	102	2	14	9		11	6	1	1	0	3	0	0	0
48	61197	408	145	12	86	41	112	3	6	3		20	9	0	4	2	4	1	0	0
49	60591	405	140	7	104	39	93	3	15	4		17	4	0	6	1	6	0	0	0
50	60840	387	120	10	85	50	101	3	14	4		17	5	0	3	1	3	1	2	2
51	60811	393	116	11	104	41	107	2	6	6		12	2	1	3	1	5	0	0	0
52	61467	444	156	7	100	43	117	4	8	9		9	5	0	2	1	1	0	0	0
53	61317	409	136	5	104	39	110	2	2	11		12	3	0	3	3	3	0	0	0
54	60677	391	131	5	92	44	99	4	11	5		17	8	0	5	1	3	0	0	0
55	61650	406	133	5	88	44	118	2	6	10		16	5	1	3	0	7	0	0	0
56	61933	420	149	12	96	46	101	4	6	6		11	0	1	7	2	1	0	0	0
57	61747	413	141	10	101	42	105	3	5	6		19	6	1	6	1	4	1	0	0
58	61277	454	149	7	95	57	112	6	18	10		11	4	0	0	4	3	0	0	0
59	62022	434	147	2	110	41	114	2	11	7		21	5	0	4	4	4	0	4	0
60	61059	417	149	8	96	40	107	3	7	7		17	8	1	4	1	3	0	0	0
61	62138	428	150	9	116	35	107	4	6	1		20	8	0	5	3	4	0	0	0
62	61436	442	152	9	93	47	119	2	12	8		6	4	0	1	0	1	0	0	0
63	61272	386	120	4	105	40	102	2	8	5		12	2	0	6	1	2	0	1	0
64	61795	442	159	10	102	37	114	7	5	8		16	4	1	4	0	6	1	0	0
65	62021	388	125	5	88	49	109	5	5	2		18	2	0	6	0	9	0	1	0
66	62027	426	131	10	105	53	105	5	11	6		12	4	0	2	2	4	0	0	0
67	62371	425	147	12	90	47	112	4	5	8		13	5	0	2	2	4	0	0	0
68	61778	439	170	7	101	32	110	4	9	6		13	7	0	3	2	1	0	0	0
69	61965	446	152	8	113	38	113	1	11	10		17	5	0	7	0	5	0	0	0
70	63153	384	125	8	84	47	101	3	10	6		7	0	0	5	0	2	0	0	0
71	62450	449	148	13	108	50	99	8	12	11		7	3	0	0	0	4	0	0	0
72	62044	437	150	9	115	41	96	1	14	11		8	3	0	3	0	2	0	0	0
73	61790	433	171	4	97	40	99	5	9	8		21	10	0	4	2	5	0	0	0
74	61959	419	143	5	99	43	112	2	9	6		11	2	0	3	1	5	0	0	0
75	61245	444	170	9	114	42	91	6	6	6		13	3	0	4	3	3	0	0	0
76	61275	397	140	6	82	48	101	3	10	7		9	4	0	1	2	2	0	0	0
77	62686	394	121	11	94	44	103	2	8	11		15	7	0	5	2	1	0	0	0
78	62101	434	136	5	110	35	118	5	14	11		13	5	0	4	1	2	0	0	1
79	61941	447	156	9	108	29	125	4	8	8		11	3	0	3	1	4	0	0	0
80	62603	448	152	11	102	43	123	1	11	5		10	4	0	2	0	4	0	0	0
81	61345	428	151	6	108	36	111	2	10	4		11	5	0	2	2	2	0	0	0
82	61859	423	143	12	95	44	114	2	5	8		12	2	0	3	2	4	0	0	1
83	62350	516	178	16	107	56	132	2	16	9		19	7	0	5	1	4	0	1	1
84	63146	541	195	8	135	61	122	5	8	7		26	12	0	5	1	7	1	0	0
85	62004	450	170	8	92	44	121	5	3	7		17	3	1	4	1	8	0	0	0
86	61929	441	174	4	102	42	100	1	9	9		8	5	0	3	0	0	0	0	0
87	61933	406	151	8	92	31	104	5	10	5		9	5	0	1	1	2	0	0	0
88	61933	412	151	8	81	35	117	4	10	6		14	3	0	2	2	7	0	0	0
89	62334	588	215	12	141	57	140	6	10	7		14	4	0	4	4	1	0	1	0
90	62168	422	141	8	118	42	100	1	8	4		12	8	0	3	0	1	0	0	0
91	62110	525	206	3	105	51	134	2	17	7		14	6	0	3	1	3	0	1	0
92	61826	422	151	11	93	49	95	7	6	10		5	1	0	3	0	1	0	0	0
93	60605	456	147	4	103	52	128	3	11	8		14	5	0	5	1	3	0	0	0
94	61322	437	138	10	127	39	104	4	9	6		16	7	1	5	1	2	0	0	0
95	62963	419	139	6	98	44	116	3	8	5		12	6	0	6	0	0	0	0	0
96	62051	442	148	13	107	45	107	6	9	7		6	1	0	2	2	0	1	0	0
97	62552	436	169	9	93	41	108	5	5	6		14	4	0	5	1	3	1	0	0
98	61444	398	139	8	86	45	102	0	9	9		16	5	1	7	2	1	0	0	0
99	62147	434	149	10	96	44	120	4	6	5		14	6	1	0	2	4	0	0	1
100	61510	411	150	9	86	46	103	1	7	9		14	6	1	4	2	1	0	0	0
101	62585	441	156	10	106	42	112	3	7	5		19	10	0	3	1	4	1	0	0
102	63331	426	149	10	93	52	112	0	8	2		13	7	1	3	1	1	0	0	0
103	62711	480	175	5	115	49	120	6	5	5		16	7	0	2	0	7	0	0	0
104	62615	444	164	10	99	50	95	5	15	6		11	2	0	3	2	4	0	0	0
105	61916	410	143	7	88	40	108	5	6	13		21	8	0	4	1	7	0	0	1
106	62444	434	167	7	102	45	92	4	11	6		10	7	0	0	0	2	0	0	1
107	62418	376	119	4	97	38	98	5	8	7		9	2	0	3	0	4	0	0	0
108	62642	397	150	8	95	27	98	5	9	5		15	6	0	2	2	5	0	0	0
109	61919	375	129	4	98	37	89	4	6	8		12	5	0	2	2	2	1	0	0
110	62747	448	158	11	113	47	107	2	7	3		9	1	0	4	2	2	0	0	0
111	62764	417	145	9	84	44	110	5	10	10		8	5	0	2	0	1	0	0	0
112	61442	448	169	9	98	36	118	6	5	7		14	6	0	2	0	6	0	0	0
113	62933	523	199	8	113	55	130	1	11	6		17	7	0	2	4	4	0	0	0
114	62821	468	156	9	116	50	121	3	7	6		13	6	0	1	3	3	0	0	0
115	62107	407	136	14	98	34	104	2	9	10		7	2	0	0	1	3	1	0	0
116	61817	422	142	10	111	48	99	0	6	6		12	2	1	2	2	4	0	1	0
117	62500	422	141	8	101	57	93	4	13	5		17	6	0	2	3	5	0	1	0
118	62429	450	160	7	101	49	117	4	7	5		13	3	0	4	2	4	0	0	0
119	61527	440	163	12	102	44	106	1	7	5		14	6	1	3	3	1	0	0	0
120	61839	388	140	8	90	38	98	2	8	4		15	4	0	3	1	6	1	0	0
